# Supplementary material
Source: Springer Nature journal article supplement (https://www.springermedizin.de/resource/supplementary/12967_2013_1763_MOESM6_ESM.pdf/9575298)

**(a) Original site :  
Pre-treatment**

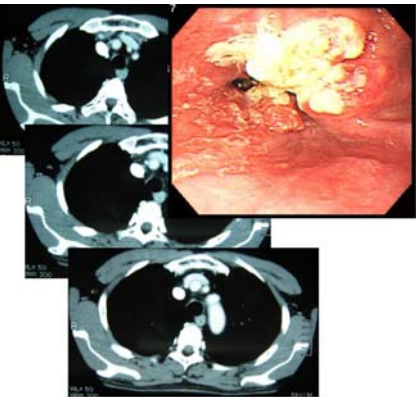

**(b) Original site :  
Post- treatment (8<sup>th</sup> vaccination)**

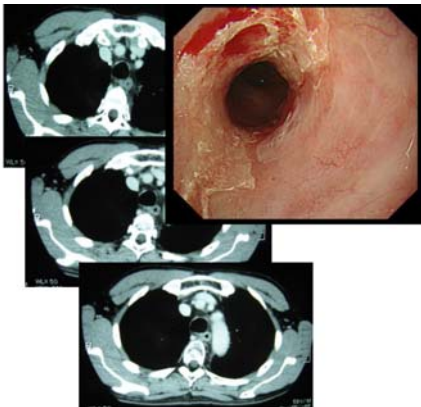

**(c) Lymph node metastasis :  
Pre-treatment**

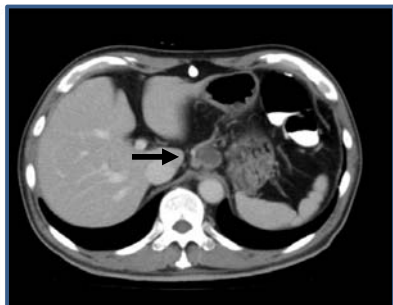

**(d) Lymph node metastasis:  
Post- treatment (8<sup>th</sup> vaccination)**

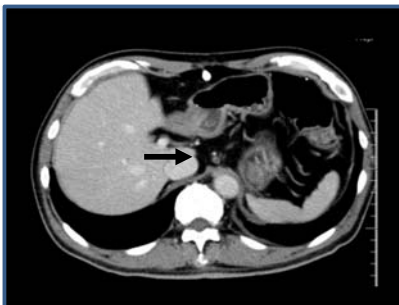

Supplement: MOESM6 [file 9575298]
